# Supplementary material for: Development of a Sildenafil Citrate Microemulsion-Loaded Hydrogel as a Potential System for Drug Delivery to the Penis and Its Cellular Metabolic Mechanism
Source: PubMed Central journal article supplement (PMC7694282; doi:10.3390/pharmaceutics12111055), 2020-11-04
Supplement: pharmaceutics-12-01055-s001.pdf [file pharmaceutics-12-01055-s001.pdf]

# Development of Sildenafil Citrate Microemulsion-Loaded Hydrogel as Potential Systems for Drug Delivery to the Penis and Its Cellular Metabolic Mechanism

Apichart Atipairin, Charisopon Chunhachaichana, Titpawan Nakpheng, Narumon Changsan, Teerapol Srichana and Somchai Sawatdee

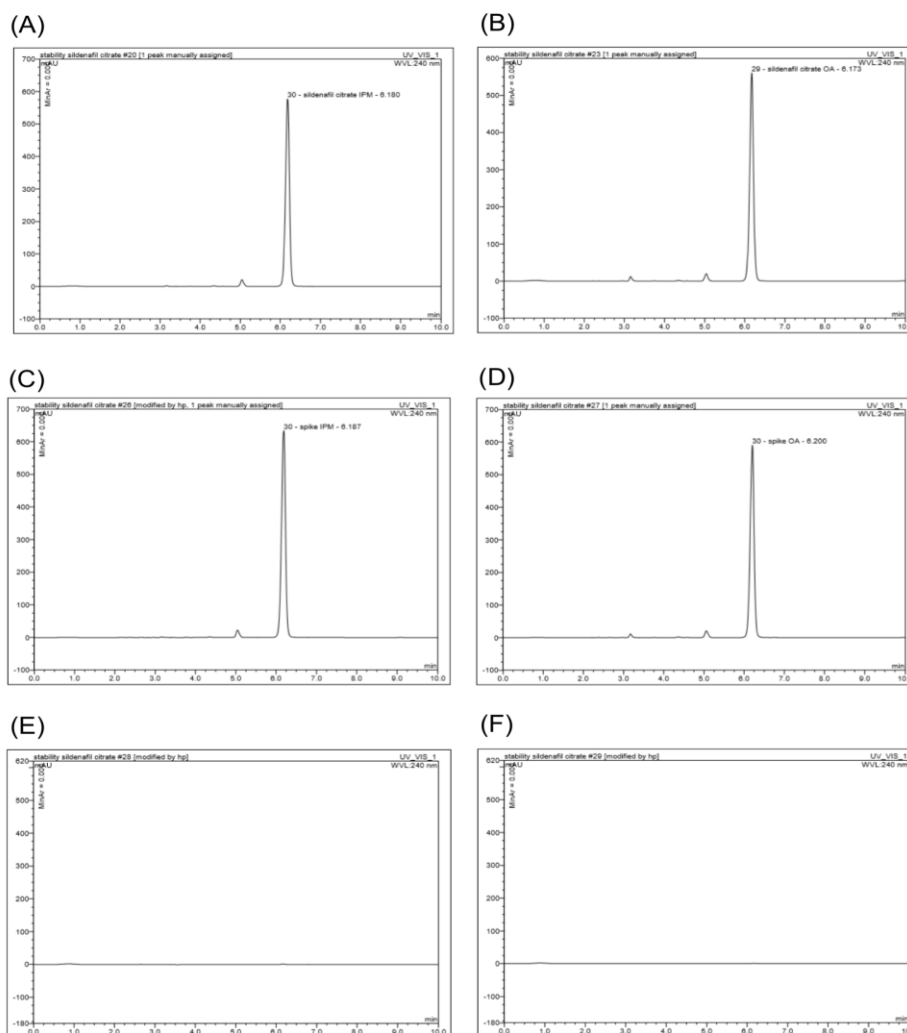

**Figure S1.** The specificity validation for HPLC analytical method for the quantitation of sildenafil citrate in the microemulsion-loaded hydrogel system. (A) Sildenafil citrate in isopropyl myristate microemulsion-loaded hydrogel system, (B) sildenafil citrate in oleic acid microemulsion-loaded hydrogel system, (C) standard sildenafil citrate spike in the isopropyl myristate microemulsion-loaded hydrogel system, (D) standard sildenafil citrate spike in the oleic acid microemulsion-loaded hydrogel system, (E) placebo in the isopropyl myristate microemulsion-loaded hydrogel system, (F) placebo in the oleic acid microemulsion-loaded hydrogel system.

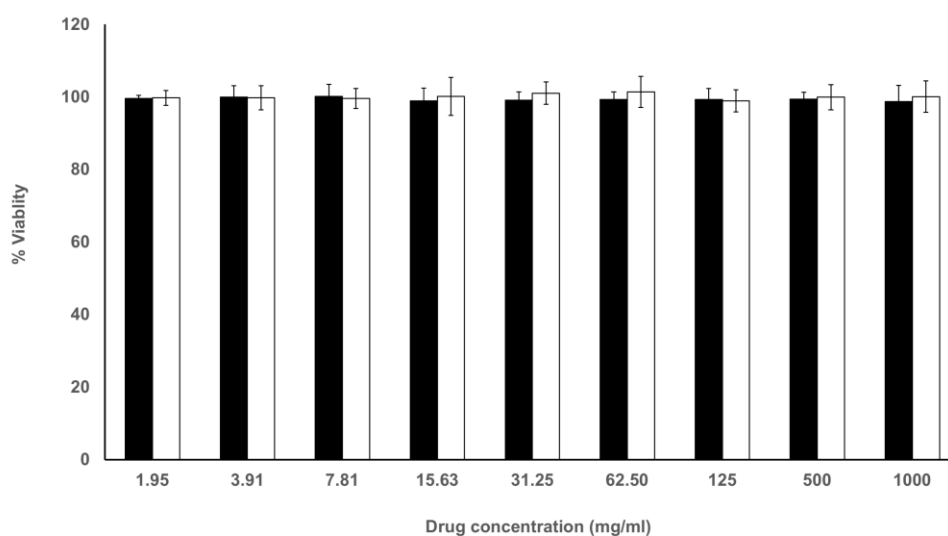

**Figure S2.** Cell viability in HepG2 cells using the MTT assay after being induced with sildenafil citrate microemulsion-loaded hydrogel for 24 h. Data are shown as mean  $\pm$  SD of triplicate assays.

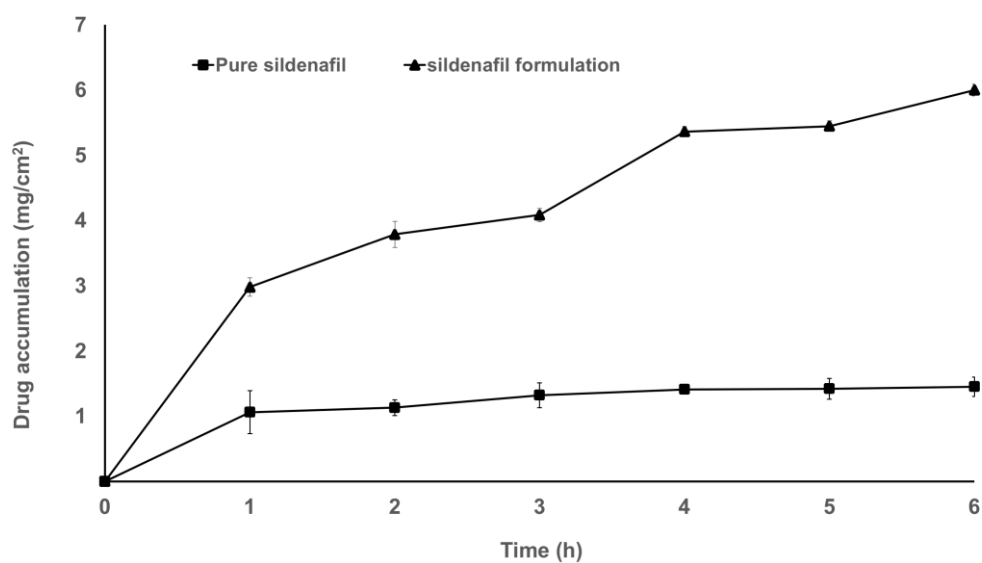

**Figure S3.** Amount of sildenafil citrate accumulation in the cell after incubation for 6 h.

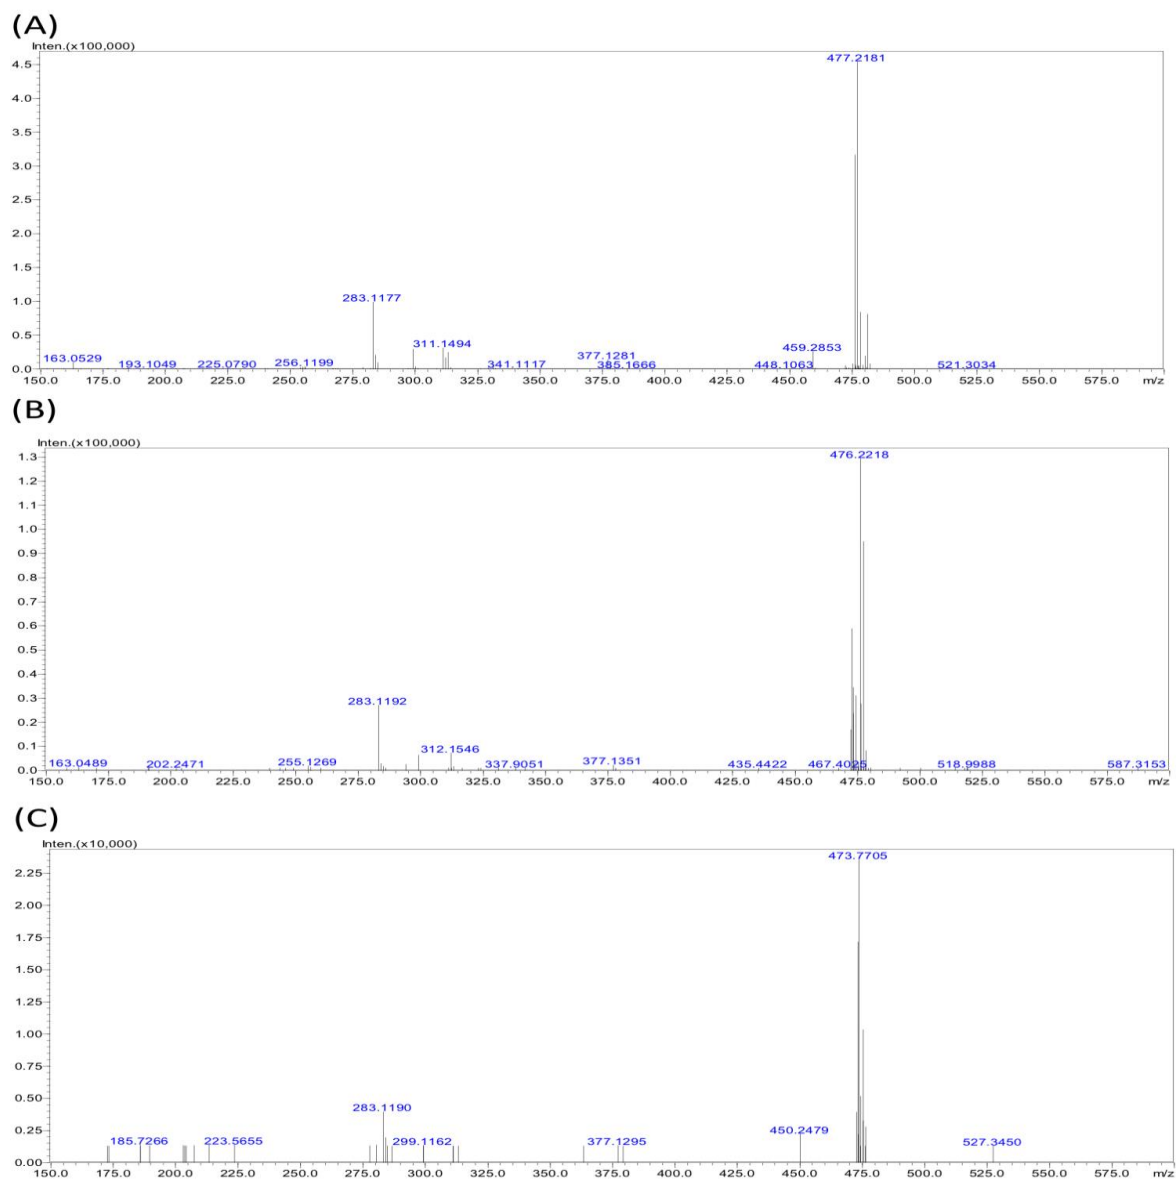

**Figure S4.** LC-MS/MS chromatogram of (A) sildenafil citrate, (B) drug extraction from cells incubated in sildenafil citrate aqueous solution for 6 h, (C) drug extraction from cells incubated in the sildenafil citrate microemulsion-loaded hydrogel (IPM system) for 6 h.
